# Supplementary material
Source: HighWire-hosted journal article supplement (https://bmjopen.bmj.com/content/6/12/e013096)
Supplement: inline-supplementary-material-1 [file inline-supplementary-material-1.pdf]

## Appendix A

Variance Estimates assuming that baseline and follow-up treatment variance is equal

### ANCOVA

For a reasonably sized RCT, the variance of  $\hat{\beta}$  from equation (1), is approximately

$$\left\{ \frac{1}{n_1} + \frac{1}{n_2} \right\} \sigma^2 (1 - \rho_{01}^2)$$

where  $\rho_{01}$  is the within subject correlation between baseline and follow-up measurements.

### LDA model

The variance of this estimate  $\hat{\delta}$  from equation (2) ( $\sigma_0^2 = \sigma_1^2 = \sigma^2$ ) can be written as,

$$\left\{ \frac{1}{n_1} + \frac{1}{n_2} \right\} 2\sigma^2 (1 - \rho_{01})$$

We could also estimate the treatment difference at follow-up (POST only) between the treatment arms which is  $(\hat{\gamma} + \hat{\delta})$ . The variance of this estimate  $(\hat{\gamma} + \hat{\delta})$  is then

$$\left\{ \frac{1}{n_1} + \frac{1}{n_2} \right\} 2\sigma_1^2$$

### cLDA Model

The variance of this estimate  $\hat{\delta}'$  from equation (3) is then (11, 12)

$$\left\{ \frac{1}{n_1} + \frac{1}{n_2} \right\} \sigma_1^2 (1 - \rho_{01}^2)$$
